# Supplementary material for: Comparing the Diagnostic Performance of Contrast-Enhanced Mammography and Breast MRI: a Systematic Review and Meta-Analysis
Source: PubMed Central journal article supplement (PMC9809339; doi:10.7150/jca.79747), 2023-01-01
Supplement: jcav14p0174s1.pdf [file jcav14p0174s1.pdf]

## **Supplementary materials**

## Supplementary materials 1

A list of publications in the database searches that were excluded after data extraction. The publications are listed per reason for exclusion.

### *Lack of sufficient details on MRI sequence parameters*

1. Lee SC, Hovanesian-Larsen L, Stahl D, et al. Accuracy of contrast-enhanced spectral mammography compared with MRI for invasive breast cancers: Prospective study in population of predominantly underrepresented minorities. *Clin Imaging*. 2021; 80: 364–70.
2. Rudnicki W, Piegza T, Rozum-Liszewska N, et al. The effectiveness of contrast-enhanced spectral mammography and magnetic resonance imaging in dense breasts. *Polish J Radiol*. 2021; 86: e159–64.
3. Anwar R, Farouk MA, Abdel Hamid WR, et al. Breast cancer in dense breasts: comparative diagnostic merits of contrast-enhanced mammography and diffusion-weighted breast MRI. *Egypt J Radiol Nucl Med*. 2021; 52: 1–13.

### *CEM was performed on a prototype system*

4. Fallenberg EM, Dromain C, Diekmann F, et al. Contrast-enhanced spectral mammography versus MRI: initial results in the detection of breast cancer and assessment of tumour size. *Eur Radiol*. 2014; 24: 256–64.
5. Fallenberg EM, Schmitzberger FF, Amer H, et al. Contrast-enhanced spectral mammography vs. mammography and MRI – clinical performance in a multi-reader evaluation. *Eur Radiol*. 2017; 27: 2752–64.
6. Sumkin JH, Berg WA, Carter GJ, et al. Diagnostic performance of MRI, molecular breast imaging, and contrast-enhanced mammography in women with newly diagnosed breast cancer. *Radiology*. 2019; 293: 531–40.

*Incomplete absolute numbers of TP, FP, FN, and TN or mismatch with research question*

7. Bozzini A, Nicosia L, Pruneri G, et al. Clinical performance of contrast-enhanced spectral mammography in pre-surgical evaluation of breast malignant lesions in dense breasts: a single center study. *Breast Cancer Res Treat.* 2020; 184: 723–31.
8. Carnahan MB, Pockaj B, Pizzitola V, et al. Contrast-enhanced mammography for newly diagnosed breast cancer in women with breast augmentation: Preliminary findings. *Am J Roentgenol.* 2021; 217: 855–6.
9. Cheung Y-C, Juan Y-H, Lo Y-F, et al. Preoperative assessment of contrast-enhanced spectral mammography of diagnosed breast cancers after sonographic biopsy: correlation to contrast-enhanced magnetic resonance imaging and 5-year postoperative follow-up. *Medicine (Baltimore).* 2020; 99: e19024.
10. Jochelson MS, Dershaw DD, Sung JS, et al. Bilateral contrast-enhanced dual-energy digital mammography: feasibility and comparison with conventional digital mammography and MR imaging in women with known breast carcinoma. *Radiology.* 2013; 266: 743–51.
11. Kim EY, Youn I, Lee KH, et al. Diagnostic value of contrast-enhanced digital mammography versus contrast-enhanced magnetic resonance imaging for the preoperative evaluation of breast cancer. *J Breast Cancer.* 2018; 21: 453–62.
12. Lee-Felker SA, Tekchandani L, Thomas M, et al. Newly diagnosed breast cancer: comparison of contrast-enhanced spectral mammography and breast MR imaging in the evaluation of extent of disease. *Radiology.* 2017; 285: 389–400.
13. Li L, Roth R, Germaine P, et al. Contrast-enhanced spectral mammography (CESM) versus breast magnetic resonance imaging (MRI): a retrospective comparison in 66 breast lesions. *Diagn Interv Imaging.* 2017; 98: 113–23.
14. Youn I, Choi SH, Choi YJ, et al. Contrast enhanced digital mammography versus

magnetic resonance imaging for accurate measurement of the size of breast cancer. *Br J Radiol.* 2019; 92: 20180929.

15. Ferranti FR, Vasselli F, Barba M, et al. Diagnostic accuracy of contrast-enhanced, spectral mammography (CESM) and 3T magnetic resonance compared to full-field digital mammography plus ultrasound in breast lesions: Results of a (pilot) open-label, single-centre prospective study. *Cancers (Basel).* 2022; 14: 1351.

## Supplementary materials 2

A list of included publications in the systematic review and meta-analysis of Xiang et al., which were excluded for current systematic review and meta-analysis. The publications are listed per reason(s) for exclusion.

### *Publications in languages other than English*

1. Jiang TT, Zhang SJ, Li RM, et al. Diagnostic performance of contrast-enhanced spectral mammography. *Chin J Radiol* 2017; 51: 273–8.
2. Xu HD. A comparative study of contrast-enhanced spectral mammography and magnetic resonance imaging in breast cancer diagnosis. *Chin J Gen Pract* 2017; 15: 650–3.
3. Yu MQ, Li JC. Comparative study of contrast-enhanced spectral mammography and dynamic contrast-enhanced magnetic resonance imaging in diagnosis of breast cancer. *Chin Med Dev* 2017; 32: 74–7.
4. Zou M, Wang YJ, Jin B, et al. Comparison of diagnostic efficacy between CESM and CE-MRI in breast diseases. *Chin Comput Med Imag* 2018; 24: 211–4.

### *Conference abstract or proceedings*

5. Dromain C, Canale S, Bidault F, et al. Value of contrast-enhanced spectral mammography (CESM) in women with newly diagnosed breast cancers compared to MRI: preliminary results. *Radiol. Soc. North Am. 2011 Sci. Assem. Annu. Meet.*, 2011.
6. Li L, Liao L, Germaine P, et al. Abstract P1-02-06: Retrospective comparison of sensitivity and positive predictive value (PPV) of contrast enhanced spectral mammography (CESM) to contrast enhanced breast MRI (BMRI) in 50 malignant

breasts. *Cancer Res.* 2015; 75: P1-02–6.

*Untraceable publication*

7. Zhang CZ, Wang QG, Wang JF, et al. Feasibility of contrast-enhanced spectral mammography in the diagnosis of breast cancer. *Radiol Pract* 2014; 29: 1420–3.

*Study in which CEM was performed on a prototype system*

8. Fallenberg EM, Schmitzberger FF, Amer H, et al. Contrast-enhanced spectral mammography vs. mammography and MRI – clinical performance in a multi-reader evaluation. *Eur Radiol.* 2017; 27: 2752–64.

*Studies with a patient population consisting exclusively of women with an index tumor*

8. Fallenberg EM, Schmitzberger FF, Amer H, et al. Contrast-enhanced spectral mammography vs. mammography and MRI – clinical performance in a multi-reader evaluation. *Eur Radiol.* 2017; 27: 2752–64.
9. Jochelson MS, Dershaw DD, Sung JS, et al. Bilateral contrast-enhanced dual-energy digital mammography: feasibility and comparison with conventional digital mammography and MR imaging in women with known breast carcinoma. *Radiology.* 2013; 266: 743–51.
10. Lee-Felker SA, Tekchandani L, Thomas M, et al. Newly diagnosed breast cancer: comparison of contrast-enhanced spectral mammography and breast MR imaging in the evaluation of extent of disease. *Radiology.* 2017; 285: 389–400.
11. Li L, Roth R, Germaine P, et al. Contrast-enhanced spectral mammography (CESM) versus breast magnetic resonance imaging (MRI): a retrospective comparison in 66 breast lesions. *Diagn Interv Imaging.* 2017; 98: 113–23.

Table S1: Absolute numbers of true positive, false negative, false positive and true negative lesions and performance.

| <i>Author</i>                    | <b># Lesions</b> | <b>TP</b> | <b>FN</b> | <b>FP</b> | <b>TN</b> | <b>Sensitivity</b> | <b>Specificity</b> | <b>PPV</b>       | <b>NPV</b>       |
|----------------------------------|------------------|-----------|-----------|-----------|-----------|--------------------|--------------------|------------------|------------------|
| <b>CEM</b>                       |                  |           |           |           |           |                    |                    |                  |                  |
| <i>Kamal et al. [32]</i>         | 171              | 113       | 7         | 18        | 33        | 94%<br>[88-98]     | 65%<br>[50-78]     | 86%<br>[79-92]   | 82%<br>[67-93]   |
| <i>Luczynska et al. [33]</i>     | 118              | 81        | 0         | 25        | 12        | 100%<br>[96-100]   | 32%<br>[18-50]     | 76%<br>[67-84]   | 100%<br>[74-100] |
| <i>Petrillo et al. [34]</i>      | 90               | 42        | 10        | 8         | 30        | 81%<br>[67-90]     | 79%<br>[63-90]     | 84%<br>[71-93]   | 75%<br>[59-87]   |
| <i>Wang et al. [35]</i>          | 77               | 46        | 2         | 10        | 19        | 96%<br>[86-99]     | 66%<br>[46-82]     | 82%<br>[70-91]   | 90%<br>[70-99]   |
| <i>Xing et al. [36]</i>          | 263              | 173       | 4         | 9         | 77        | 98%<br>[94-99]     | 90%<br>[81-95]     | 95%<br>[91-98]   | 95%<br>[88-99]   |
| <i>Yasin &amp; El Ghany [37]</i> | 56               | 32        | 2         | 0         | 22        | 94%<br>[80-99]     | 100%<br>[85-100]   | 100%<br>[89-100] | 92%<br>[73-99]   |
| <b>Breast MRI</b>                |                  |           |           |           |           |                    |                    |                  |                  |
| <i>Kamal et al. [32]</i>         | 171              | 120       | 0         | 16        | 35        | 100%<br>[97-100]   | 69%<br>[54-81]     | 88%<br>[82-93]   | 100%<br>[90-100] |
| <i>Luczynska et al. [33]</i>     | 118              | 75        | 6         | 26        | 11        | 93%<br>[85-97]     | 30%<br>[16-47]     | 74%<br>[65-82]   | 65%<br>[38-86]   |
| <i>Petrillo et al. [34]</i>      | 90               | 47        | 5         | 6         | 32        | 90%<br>[79-97]     | 84%<br>[69-94]     | 89%<br>[77-96]   | 86%<br>[71-96]   |
| <i>Wang et al. [35]</i>          | 77               | 45        | 3         | 5         | 24        | 94%<br>[83-99]     | 83%<br>[64-94]     | 90%<br>[78-97]   | 89%<br>[71-98]   |
| <i>Xing et al. [36]</i>          | 263              | 174       | 3         | 17        | 69        | 98%<br>[95-100]    | 80%<br>[70-88]     | 91%<br>[86-95]   | 96%<br>[88-99]   |
| <i>Yasin &amp; El Ghany [37]</i> | 56               | 34        | 0         | 1         | 21        | 100%<br>[90-100]   | 95%<br>[77-100]    | 97%<br>[85-100]  | 100%<br>[84-100] |

Abbreviations: TP: true positive; FN: false negative; FP: false positive; TN: true negative; PPV: positive predictive value; NPV: negative predictive value; CEM: contrast-enhanced mammography; MRI: magnetic resonance imaging.
